# Supplementary material for: In situ illumination with inelastic neutron scattering: a study of the photochromic material cis-1,2-dicyano-1,2-bis(2,4,5-trimethyl-3-thienyl)ethene (CMTE)
Source: Royal Society of Chemistry journal article supplement (doi:10.1039/d1cp03716a), 2021-01-01
Supplement: d1cp03716a1.pdf [file d1cp03716a1.pdf]

Supplementary Information for the manuscript “In-situ illumination with inelastic neutron scattering: A study of the photochromic material cis-1,2-dicyano-1,2-bis(2,4,5-trimethyl-3-thienyl)ethene (CMTE)”

Hamish Cavaye and Maksim Schastny

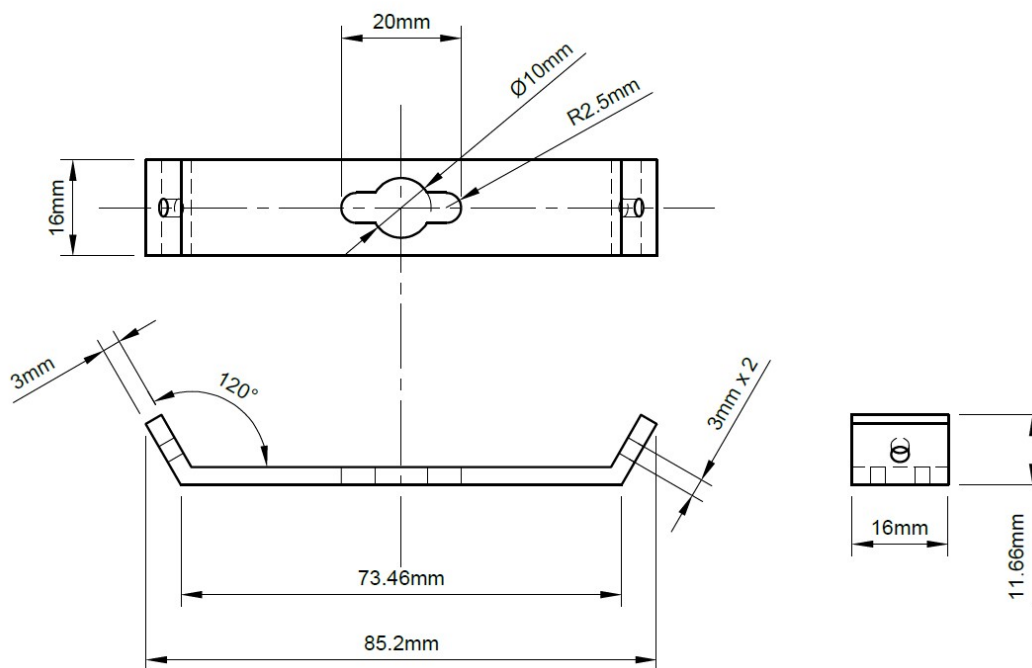

Figure S1 – CAD drawing of the acrylonitrile styrene acrylate 3-D printed bracket used to support the LEDs and associated wiring in the in-situ illumination sample environment.

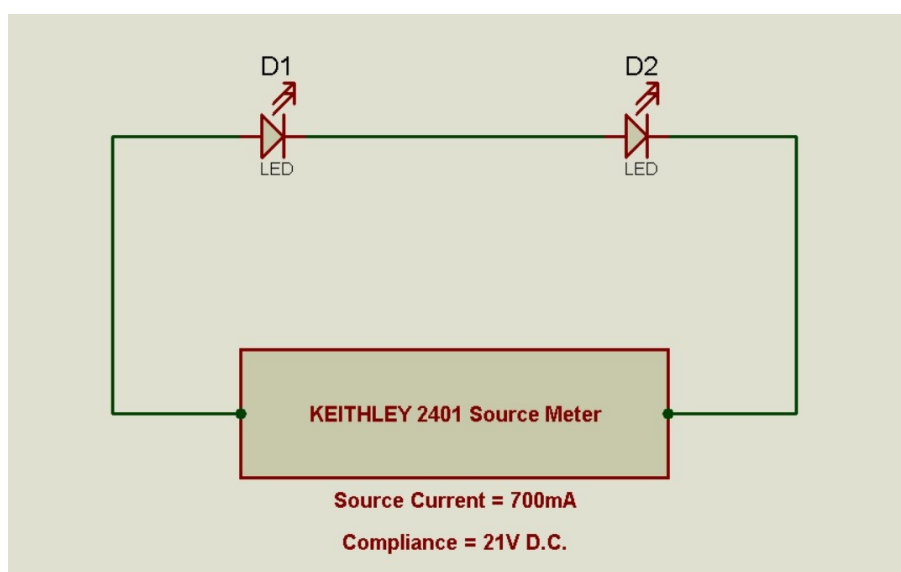

Figure S2 – Circuit diagram of the *in-situ* illumination LED circuit

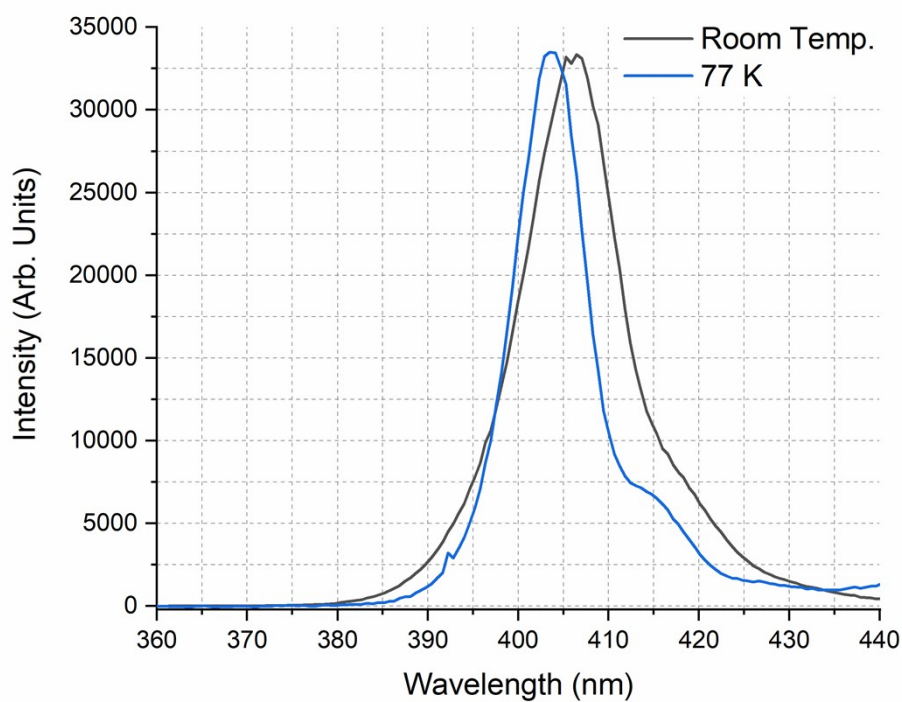

Figure S3 – Emission spectra of the LEDs used with the *in-situ* illumination sample environment showing a small blue-shift in the wavelength at low temperature.

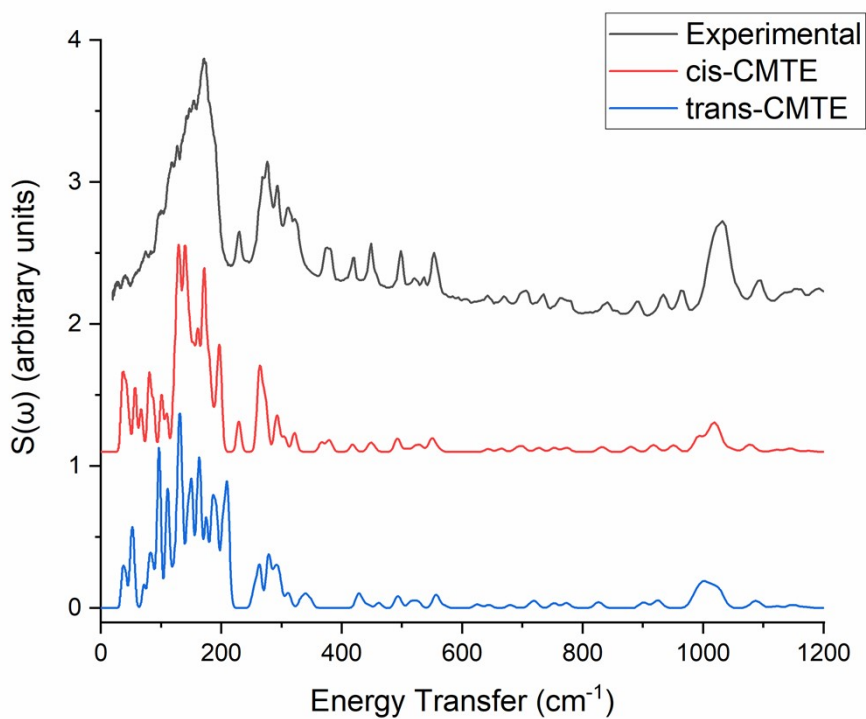

Figure S4 – A comparison of the experimental INS spectrum of unilluminated sample of CMTE (black) with the theoretical spectra of the cis- (red) and trans- (blue) forms of CMTE.
